# Supplementary material for: Long-term Investors with Enhanced Well-being? Comparing Personality Traits by Investment Assets
Source: Research Square preprint supplement (doi:10.21203/rs.3.rs-5412013/v1), 2024-11-13
Supplement: Supplementary file 1 [file 23ef5b4e862fcf70b2106244.docx]

**Supplementary Figure 1**.

*Box plot of variables measured using a 5-point scale*
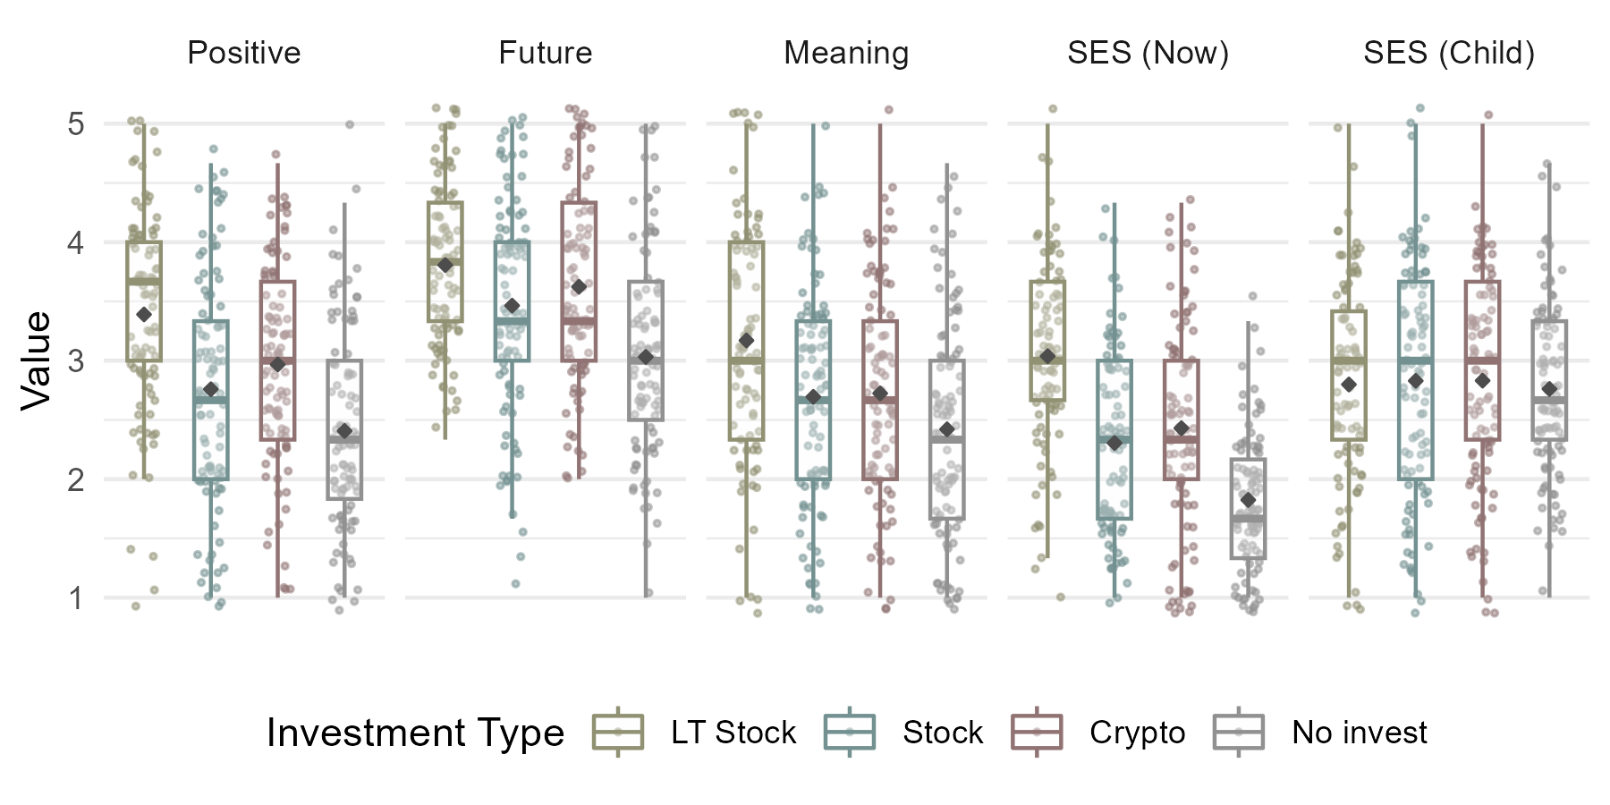


*Note*. Positive: optimistic and positive emotions toward life, Future: active and positive attitudes toward one’s future, Meaning: acknowledgment of the meaning of one’s existence

**Supplementary Figure 2**.

*Box plot of variables measured using a 7-point scale*


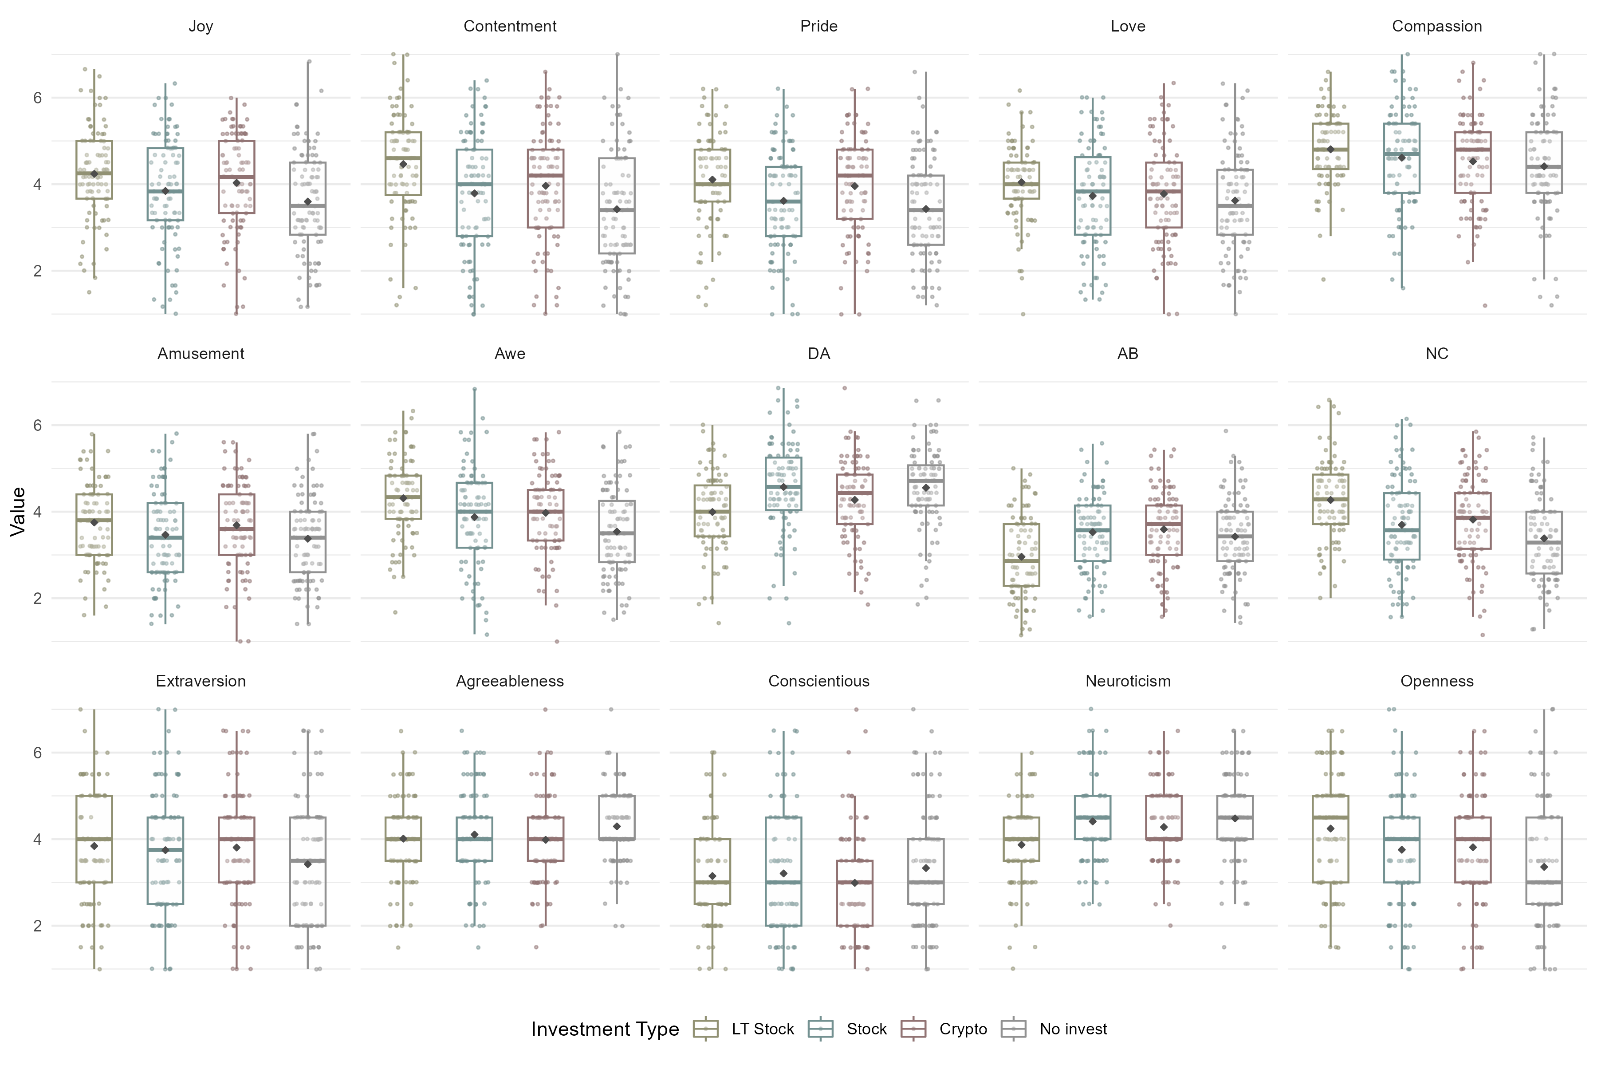


*Note*. DA: Discomfort with ambiguity, AB: Absolutism, NC: Need for complexity and novelty
